# Supplementary material for: Harnessing nature for dual action: silver nanoparticles synthesized from guava leaf extract for photocatalytic degradation of methyl red and antibacterial applications
Source: Royal Society of Chemistry journal article supplement (doi:10.1039/d5ra02503f), 2025-01-01
Supplement: d5ra02503f1.pdf [file d5ra02503f1.pdf]

## Supplementary Information

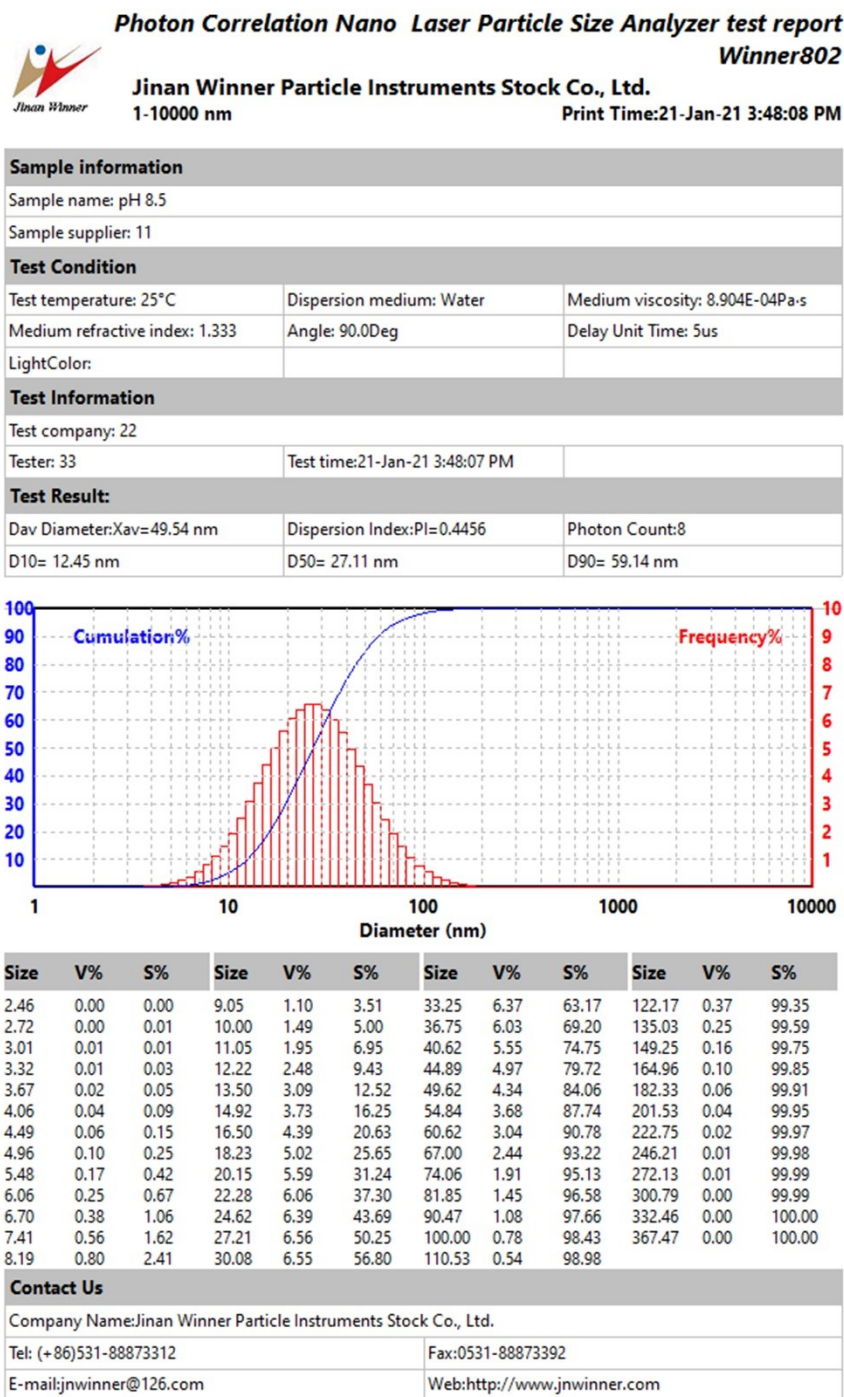

Figure S1. A DLS result of the guava leaf extract-synthesized AgNPs.

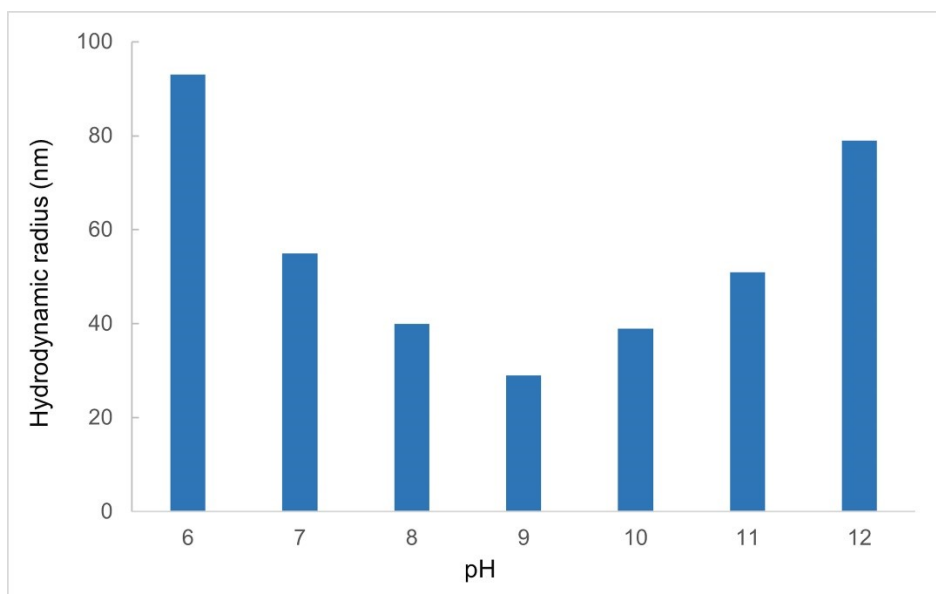

Figure S2. Hydrodynamic radius of AgNPs-GuLE synthesized at different pH conditions.

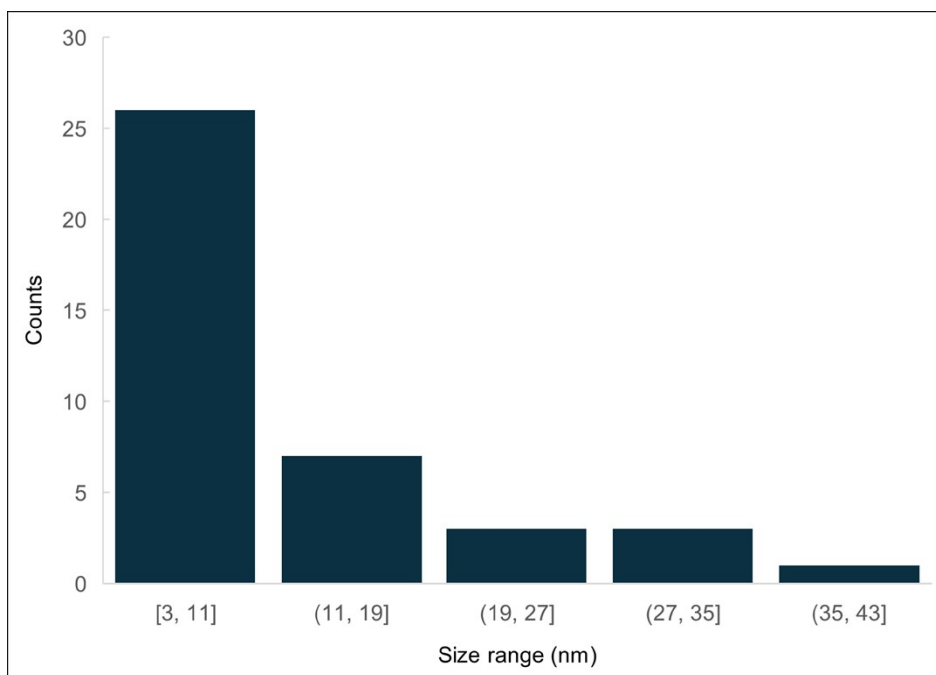

Figure S3. Histogram of AgNPs-GuLE's size distribution based on the TEM image.

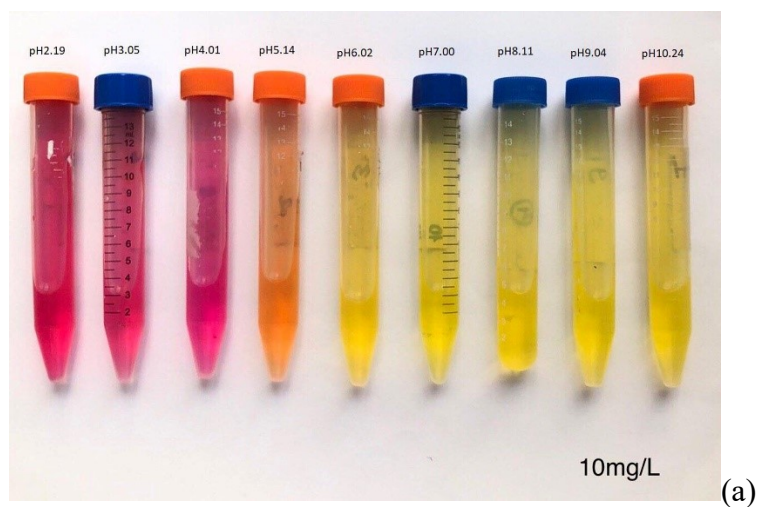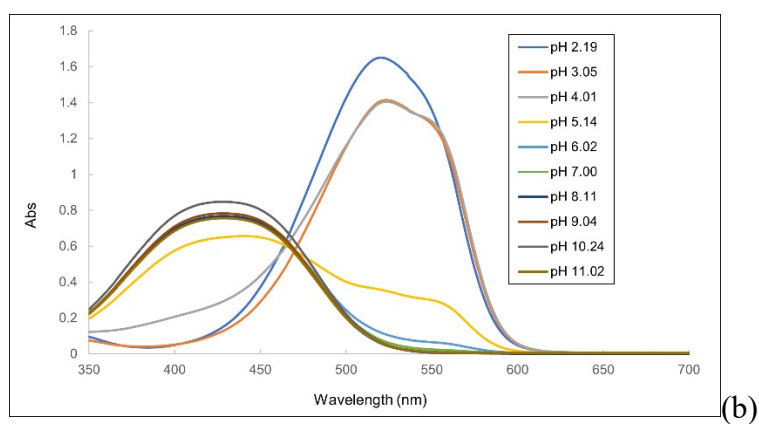

Figure S4. The color change of MR at varying pH (a) and the corresponding UV-Vis spectra (b).

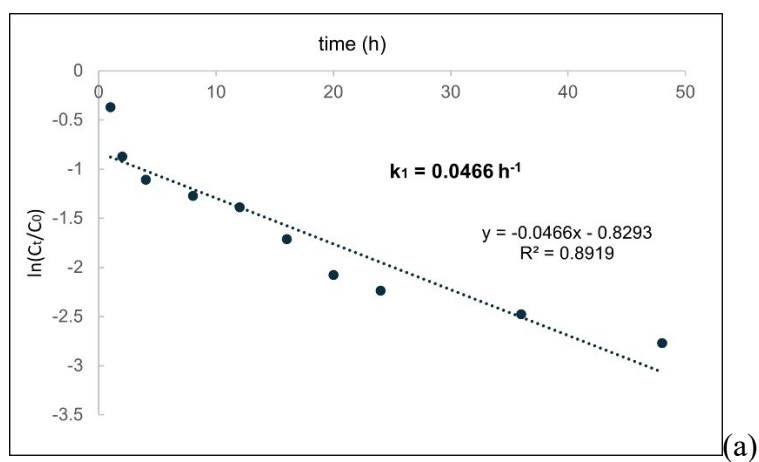

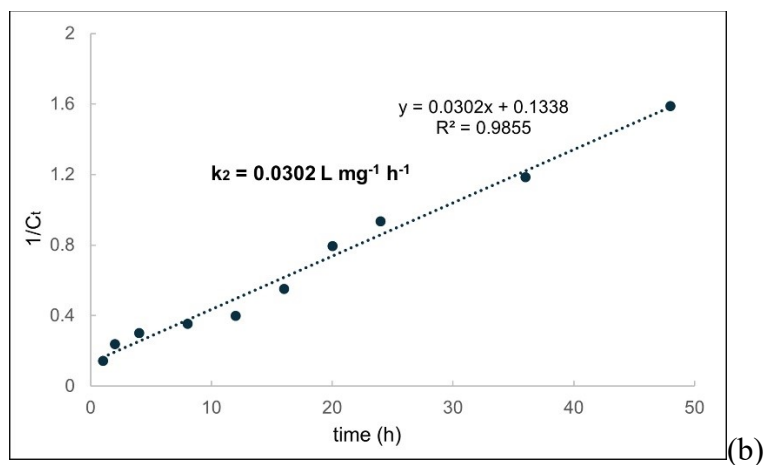

Figure S5. Plots of the pseudo-first-order kinetic (PFO) model [ $\ln(C_t/C_0) = -k_1t$ ] (a) and the pseudo-second-order (PSO) kinetic model [ $1/C_t - 1/C_0 = k_2t$ ] (b) ( $C_t$  is the MR's concentration at any light exposure time,  $C_0$  represents the initial MR's concentration,  $k_1$  denotes the PFO rate constant, and  $k_2$  is designated as the PSO rate constant).

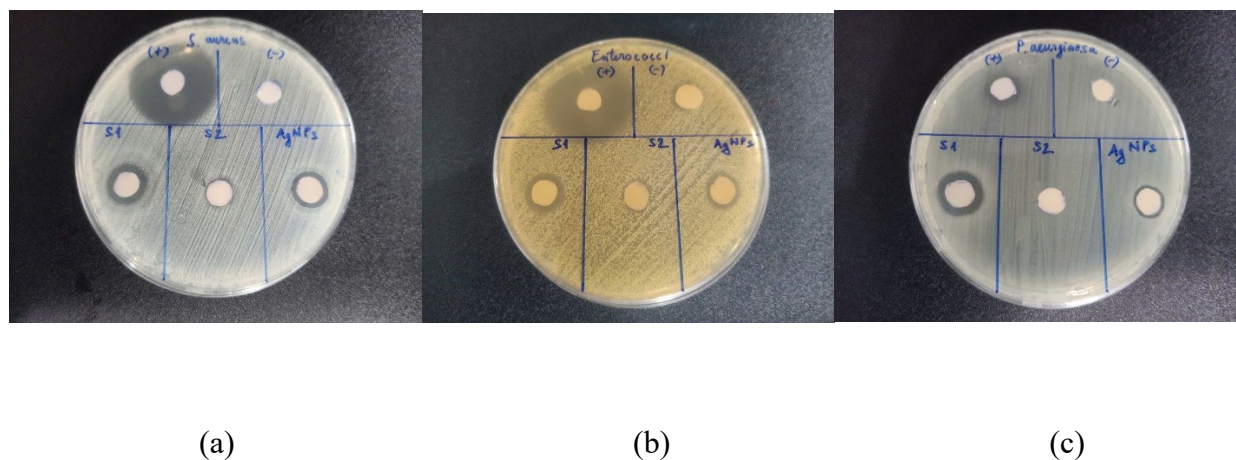

Figure S6. Results of antibacterial activity of  $\text{AgNO}_3$  (S1), guava leaf extract (S2), and guava leaf extract-synthesized AgNPs against *S. aureus* (a), *E. faecalis* (b), and *P. aeruginosa* (c). (negative control: distilled water; positive control: chloramphenicol 30 mg/L).

Table S1. Preliminary assessment of the AgNPs-GuLE's reusability in the MR photocatalytic degradation.

| <b>Cycle</b> | <b>%PD (<math>\pm</math> SD)</b> |
|--------------|----------------------------------|
| 1            | $96 \pm 0.2 \%$                  |
| 2            | $71.6 \pm 2.4 \%$                |
| 3            | $76.1 \pm 3.2 \%$                |
